# Supplementary material for: Animations to communicate public health prevention messages: a realist review protocol
Source: PubMed Central journal article supplement — BMJ Open. 2024 Aug 9;14(8):e083013. doi: 10.1136/bmjopen-2023-083013 (PMC11331919; doi:10.1136/bmjopen-2023-083013), 2024-08-09
Supplement: bmjopen-14-8-s001.pdf [file bmjopen-14-8-s001.pdf]

## Supplemental material: Ovid MEDLINE(R) Search Strategy

- 1 animat\*.ti,ab,kf.
- 2 dynamic image\*.ti,ab,kf.
- 3 dynamic picture\*.ti,ab,kf.
- 4 moving picture\*.ti,ab,kf.
- 5 moving image\*.ti,ab,kf.
- 6 motion graphic\*.ti,ab,kf.
- 7 explainer video\*.ti,ab,kf.
- 8 cartoon\*.ti,ab,kf.
- 9 or/1-8
- 10 exp Health Promotion/
- 11 exp Preventive Health Services/
- 12 Harm Reduction/
- 13 exp risk reduction behavior/
- 14 Health Communication/
- 15 (harm\* or risk or reduc\* or chang\* or prevent\* or health or intervention\* or campaign\* or promotion or communicat\*).ti,ab,kf.
- 16 or/10-15
- 17 exp Health Behavior/
- 18 exp Obesity/
- 19 exp Weight Loss/
- 20 exp Exercise/
- 21 exp Diet/
- 22 exp Alcohol Drinking/
- 23 exp Smoking/
- 24 Sexual Health/
- 25 exp Sexually Transmitted Diseases/
- 26 exp Sleep/
- 27 exp Drug Misuse/
- 28 Oral Health/
- 29 exp Dental Care/
- 30 exp Air Pollution/
- 31 exp Hygiene/
- 32 exp Mass Screening/
- 33 exp Vaccination/
- 34 health check.ti,ab,kf.
- 35 exp Breast Feeding/
- 36 or/17-35
- 37 9 and 16 and 36
